# Supplementary material for: Effects of Enrofloxacin on Nutrient Removal by a Floating Treatment Wetland Planted with Iris pseudacorus: Response and Resilience of Rhizosphere Microbial Communities
Source: MDPI journal article supplement (doi:10.3390/su14063358), 2022-03-13
Supplement: s1 [file s1]

## **Supplementary Materials**

### **Effects of enrofloxacin on nutrient removal by a floating treatment wetland planted with *Iris Pseudacorus*: response and resilience of rhizosphere microbial communities**

Naven Ramdat <sup>a</sup>, Zi-Jing Wang <sup>b</sup>, Jung-Chen Huang <sup>b\*</sup>, Yikun Wang <sup>a</sup>, Azharuddin Chachar <sup>a</sup>, Chuanqi Zhou <sup>a</sup>, Zhiping Wang <sup>a</sup>

<sup>a</sup> School of Environmental Science and Engineering, Shanghai Jiao Tong University, Shanghai 200240, PR China

<sup>b</sup> Department of Environmental Engineering, National Cheng Kung University, Tainan City 701, Taiwan

\* Corresponding author: Jung-Chen Huang. E-mail: z11002015@email.ncku.edu.tw

## **Content**

**SI 2.2.2.1** Determination of chlorophyll content

**SI 2.2.3.1** Microbial analysis.

**Table S1.** PCR primer sequences and reaction conditions

**Table S2.** Total content and concentration of N and P in plant tissue

**Table S3.** Average dissolved oxygen levels during the experimental period

**Table S4.** Richness and diversity estimation of total bacterial 16S rRNA gene in Rhizosphere from pyrosequencing analysis

**Table S5.** Relative abundance (%) of genera related to nitrogen removal

**Table S6.** Relative abundance (%) of genera related to Biological Phosphorus removal

**Figure S1.** Average temperature per week during the entire experiment.

**Figure S2.** Changes of ENR removal during the different cycles (a) and the relation between ENR removal efficiency and temperature (b)

**Figure S3.** Student's t-test bar plot on phylum level (a, b) and genus level (c, d) for the initial and final sample of tanks 1 and 2. \*:  $p < 0.05$ ; \*\*:  $p < 0.01$ ; \*\*\*:  $p < 0.001$ .

**Figure S4.** One-way ANOVA bar plot for the initial and final samples of both tanks. \*:  $p < 0.05$ ; \*\*:  $p < 0.01$ ; \*\*\*:  $p < 0.001$ .

## **References**

### SI 2.2.2.1 Determination of chlorophyll content

Briefly, with 1 gram of fresh leaves were cut into pieces and ground with a mortar and pestle. The ground samples were incubated in the 80% acetone for 24 hours at 4°C and then centrifuged at 2500 rpm for 5 minutes. The supernatant was transfer to a 100 ml flask with 80% acetone. The absorbance of this solution was measured spectrophotometrically at a wavelength of 645 nm and 663 nm in triplicate, with 80% acetone used as blank. The chlorophyll a, b and total chlorophyll were calculated using the following formulas.

$$mg \text{ chlorophyll } a \text{ per gram tissue} = \frac{12.7(A_{663}) - 2.69 (A_{645}) \times V}{1000 \times W}$$

$$mg \text{ chlorophyll } b \text{ per gram tissue} = \frac{22.9 (A_{645}) - 4.68 (A_{663}) \times V}{1000 \times W}$$

$$mg \text{ Total chlorophyll per gram tissue} = \frac{20.2 (A_{645}) - 8.02 (A_{663}) \times V}{1000 \times W}$$

Where A is the absorbance at specific wavelength, V is the final volume of chlorophyll extract in 80% acetone, and W is the fresh weight of tissues extracted.

### **SI 2.2.3.1** Microbial analysis.

A fast DNA Spin Kit for soil (MP, USA) was used to extract the bacterial DNA according to the manufacturer's protocol. Subsequently, polymerase chain reaction (PCR) amplification of the total bacterial 16S rRNA was conducted using the primers 338F-806R (Cao et al., 2016), as the PCR reaction conditions and primer sequences were presented in Table S1. After the Purified amplicons were pooled in equimolar, the PCR products were processed with Illumina Miseq PE300 platform (Illumina, San Diego, USA) for pair-end sequencing (2×250) in a Bio-Pharm Technology Company (Majorbio, Shanghai, China), while the operational taxonomic units (OTU) were formed by clustering of high-quality sequences at 97% Sequence similarity using UPARSE software (version 7.1) (Sun et al., 2019).

**Table S1. PCR primer sequences and reaction conditions**

|                                                                                                |                                                                            |
|------------------------------------------------------------------------------------------------|----------------------------------------------------------------------------|
| Primer sequences:                                                                              | Primer 338F (5'-ACTCCTACGGGAGGCA GCAG-3')                                  |
|                                                                                                | Primer 806R (5'-GGACTACHVGGGTWTCTAAT-3')                                   |
| Reaction conditions:                                                                           | Denaturation at 95 °C for 3 min                                            |
|                                                                                                | Denaturation 27 cycles of 95 °C for 30 seconds                             |
|                                                                                                | Annealing at 55 °C for 30 seconds                                          |
|                                                                                                | Annealing at 72 °C at 45 seconds                                           |
|                                                                                                | Final step for 10 min at 72 °C and 10 °C until the user halted the process |
| A mixture with a final volume of 20 µL was used to conduct the polymerase chain reaction (PCR) |                                                                            |

**Table S2. Total content and concentration of N and P in plant tissue**

|        | N content in plants [mg] |                | N concentration in plant [mg/g] |               |
|--------|--------------------------|----------------|---------------------------------|---------------|
|        | <b>Tank 1</b>            | <b>Tank 2</b>  | <b>Tank 1</b>                   | <b>Tank 2</b> |
| Shoots | 1718.85                  | 1329.55        | 21.74                           | 24.08         |
| Roots  | 5536.09                  | 2739.05        | 46.05                           | 34.07         |
| Total  | <b>7254.94</b>           | <b>4068.59</b> | <b>67.79</b>                    | <b>58.15</b>  |
|        | P content in plants [mg] |                | P concentration in plant [mg/g] |               |
|        | <b>Tank 1</b>            | <b>Tank 2</b>  | <b>Tank 1</b>                   | <b>Tank 2</b> |
| Shoots | 219.23                   | 142.80         | 2.77                            | 2.59          |
| Roots  | 812.76                   | 278.41         | 6.76                            | 3.46          |
| Total  | <b>1031.99</b>           | <b>421.21</b>  | <b>9.53</b>                     | <b>6.05</b>   |

**Table S3. Average dissolved oxygen levels during the experimental period**

| Weeks | Dissolved Oxygen [mg/l] |        |
|-------|-------------------------|--------|
|       | Tank 1                  | Tank 2 |
| 1     | 4.09                    | 3.09   |
| 2     | 3.95                    | 3.03   |
| 3     | 6.05                    | 4.70   |
| 4     | 5.39                    | 5.79   |
| 5     | 4.93                    | 5.61   |
| 6     | 6.02                    | 6.68   |

**Table S4. Richness and diversity estimation of total bacterial 16S rRNA gene in Rhizosphere from pyrosequencing analysis**

| Sample     | OTU                       | Coverage     | Richness estimators       |                           | Diversity estimators       |                             |
|------------|---------------------------|--------------|---------------------------|---------------------------|----------------------------|-----------------------------|
|            |                           |              | Chao1                     | Ace                       | Shannon                    | Simpson                     |
| <b>T1I</b> | 613.67±5.36 <sup>a</sup>  | 0.99±0.00033 | 739.49±8.09 <sup>a</sup>  | 763.57±6.37 <sup>a</sup>  | 3.99±0.047 <sup>a</sup>    | 0.06±0.0055 <sup>a</sup>    |
| <b>T1F</b> | 489.00±7.77 <sup>b</sup>  | 1.00±0.0012  | 641.58±31.04 <sup>a</sup> | 669.52±61.33 <sup>a</sup> | 2.96±0.24 <sup>b</sup>     | 0.18±0.0348 <sup>a, b</sup> |
| <b>T2I</b> | 453.33±27.81 <sup>b</sup> | 0.99±0.00033 | 613.66±36.49 <sup>a</sup> | 612.56±33.69 <sup>a</sup> | 2.80±0.27 <sup>b</sup>     | 0.24±0.060 <sup>b</sup>     |
| <b>T2F</b> | 471.67±19.81 <sup>b</sup> | 1.00±0.00067 | 633.75±33.62 <sup>a</sup> | 616.77±20.76 <sup>a</sup> | 3.54±0.076 <sup>a, b</sup> | 0.08±0.011 <sup>a, b</sup>  |

**Note:** different letters (a, b) indicate significant differences between the different values of each indicator.

(T1I: Tank 1 Initial; T1F: Tank 1 Final; T2I: Tank 2 Initial; T2F: Tank 2 Final.)



**Table S5. Relative abundance (%) of genera related to nitrogen removal**

| Genera                                           | Tank 1 initial  | Tank 1 Final    | Tank 2 Initial | Tank 2 Final    |
|--------------------------------------------------|-----------------|-----------------|----------------|-----------------|
| Genera related to nitrification process          |                 |                 |                |                 |
| Nitrospira                                       | 0.0081 ±0.00076 | 0.0072 ±0.0044  | 0              | 0.0044 ±0.0032  |
| Ellin6067                                        | 0               | 0.0025 ±0.00057 | 0.0012 ±0.0012 | 0               |
| Sum of Genera related to nitrification process   |                 |                 |                |                 |
|                                                  | 0.0081 ±0.00076 | 0.0096 ±0.0049  | 0.0012 ±0.012  | 0.0044 ±0.0032  |
| Genera related to denitrification process        |                 |                 |                |                 |
| Acidovorax                                       | 10.81 ±0.75     | 2.75 ±0.38      | 3.54 ±0.29     | 3.36 ±0.26      |
| Acinetobacter                                    | 0.0083 ±0.0048  | 0               | 0              | 0               |
| Aeromonas                                        | 0.038 ±0.0061   | 1.03 ±0.31      | 0.083 ±0.0088  | 0.30 ±0.12      |
| Azospirillum                                     | 0.083 ±0.083    | 0.0042 ±0.0022  | 0.0074 ±0.0021 | 0.0034 ±0.00043 |
| Bacillus                                         | 0.23 ±0.049     | 0.010 ±0.0023   | 0.21 ±0.036    | 0.014 ±0.0031   |
| Dechloromonas                                    | 0.011 ±0.0091   | 0               | 0.0062 ±0.0045 | 0.0012 ±0.0012  |
| Desulfovibrio                                    | 0.0012 ±0.0012  | 0.0025 ±0.0013  | 0.0085 ±0.0053 | 0               |
| Flavobacterium                                   | 0.58 ±0.19      | 0.67 ±0.090     | 1.50 ±0.50     | 0.59 ±0.036     |
| Hydrogenophaga                                   | 2.46 ±0.12      | 0.21 ±0.19      | 1.06 ±0.17     | 0.90 ±0.074     |
| Hyphomicrobium                                   | 0.75 ±0.080     | 0.080 ±0.012    | 0.28 ±0.069    | 0.030 ±0.0048   |
| Pseudomonas                                      | 0.016 ±0.012    | 4.98 ±3.40      | 0.10 ±0.0090   | 22.86 ±3.80     |
| Rhodobacter                                      | 3.98 ±0.32      | 0.16 ±0.15      | 1.44 ±0.29     | 0.66 ±0.069     |
| Rhodoplanes                                      | 0.0060 ±0.0026  | 0               | 0.0049 ±0.0033 | 0.0017 ±0.0017  |
| Sulfuritalea                                     | 0.0011 ±0.0011  | 0               | 0.0012 ±0.0012 | 0               |
| Vogesella                                        | 0.0011 ±0.0011  | 0               | 0.0049 ±0.0013 | 0               |
| Xanthomonas                                      | 0               | 0               | 0.011 ±0.011   | 0               |
| Sum of Genera related to denitrification process |                 |                 |                |                 |
|                                                  | 18.99 ±1.63     | 9.89 ±4.54      | 8.25 ±1.41     | 28.73 ±4.37     |

**Table S6. Relative abundance (%) of genera related to Biological Phosphorus removal**

| <b>Genera</b>             | <b>Tank 1 Initial</b> | <b>Tank 1 Final</b> | <b>Tank 2 Initial</b> | <b>Tank 2 Final</b> |
|---------------------------|-----------------------|---------------------|-----------------------|---------------------|
| Acinetobacter             | 0.0083 ±0.0048        | 0                   | 0                     | 0                   |
| Candidatus Accumulibacter | 0.0036 ±0.0036        | 0.013 ±0.0080       | 0.0086 ±0.0044        | 0.0037 ±0.0021      |
| Dechloromonas             | 0.011 ±0.0091         | 0                   | 0.0062 ±0.0045        | 0.0012 ±0.0012      |
| Microtholunatus           | 0.0021 ±0.0021        | 0.0079 ±0.0051      | 0.0025 ±0.0025        | 0.014 ±0.0046       |
| Pseudomonas               | 0.016 ±0.012          | 4.98 ±3.40          | 0.10 ±0.0090          | 22.86 ±3.80         |

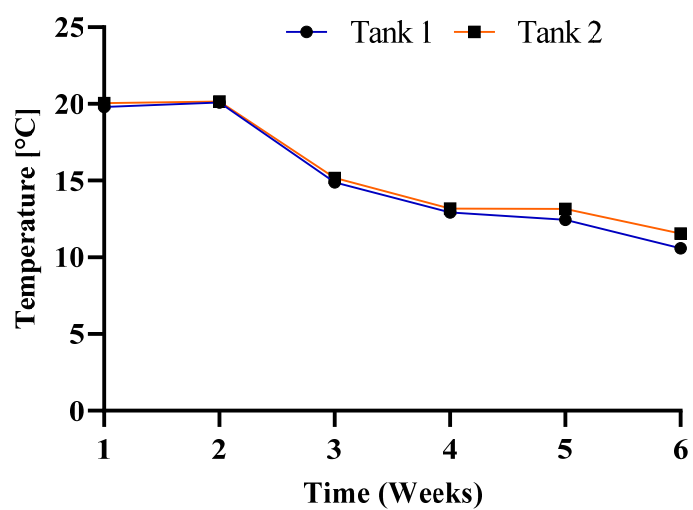

**Figure S1. Average temperature per week during the entire experiment.**

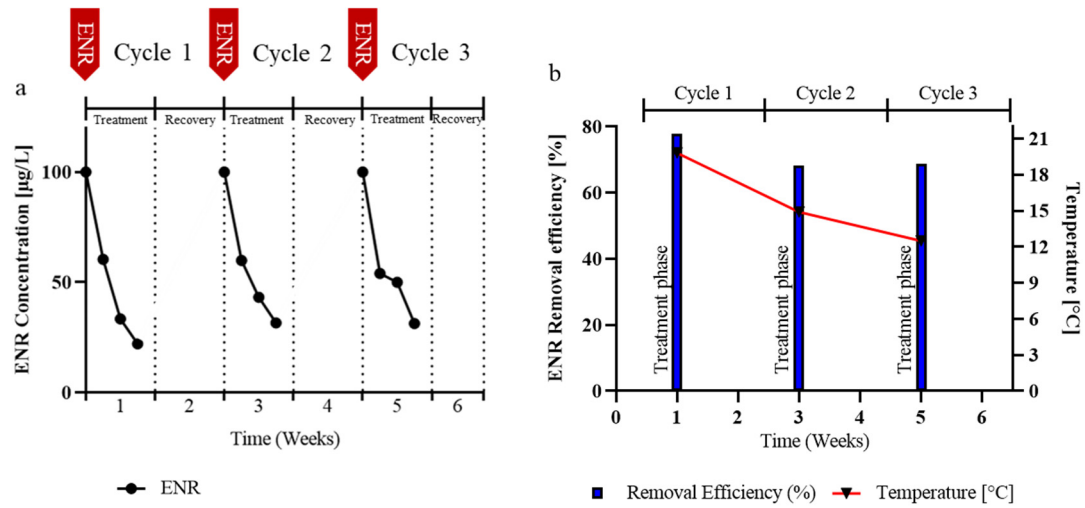

**Figure S2. Changes of ENR removal during the different cycles (a) and the relation between ENR removal efficiency and temperature (b)**

a

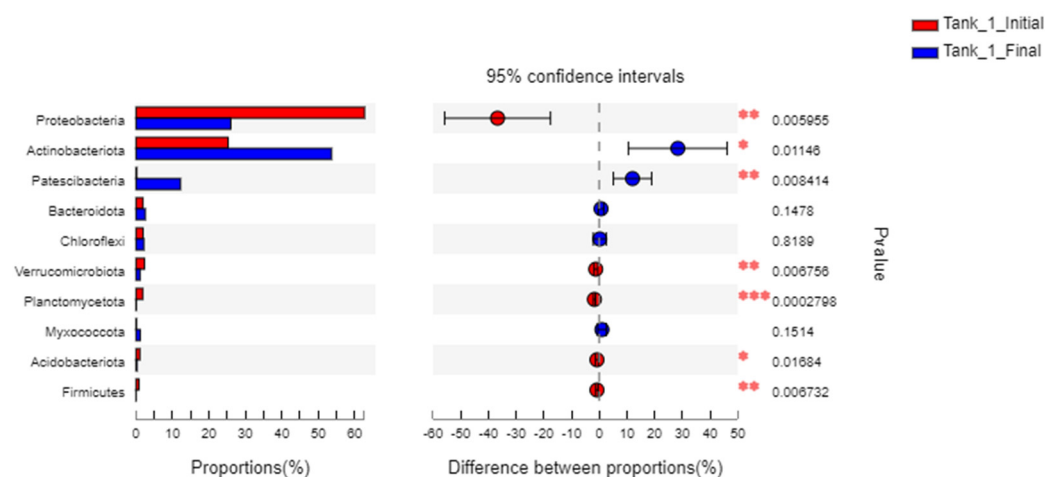

b

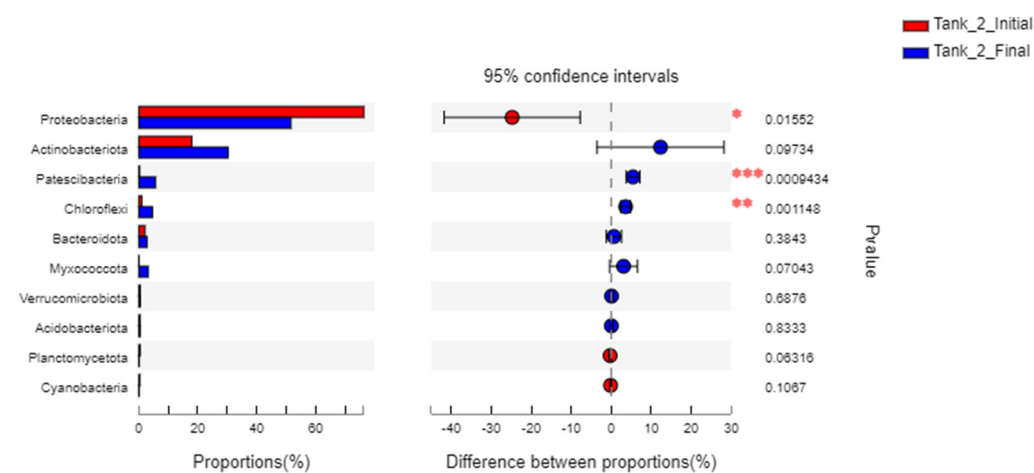

c

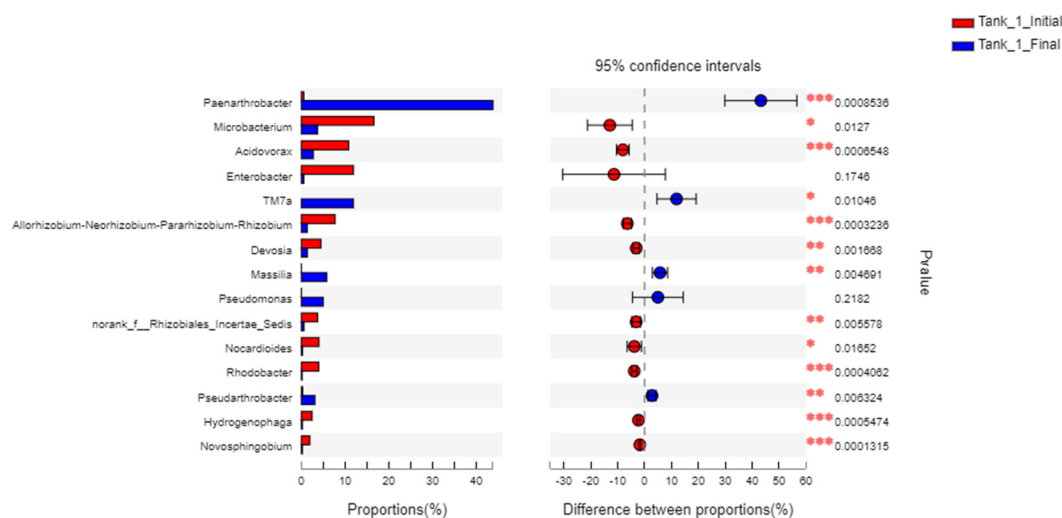

d

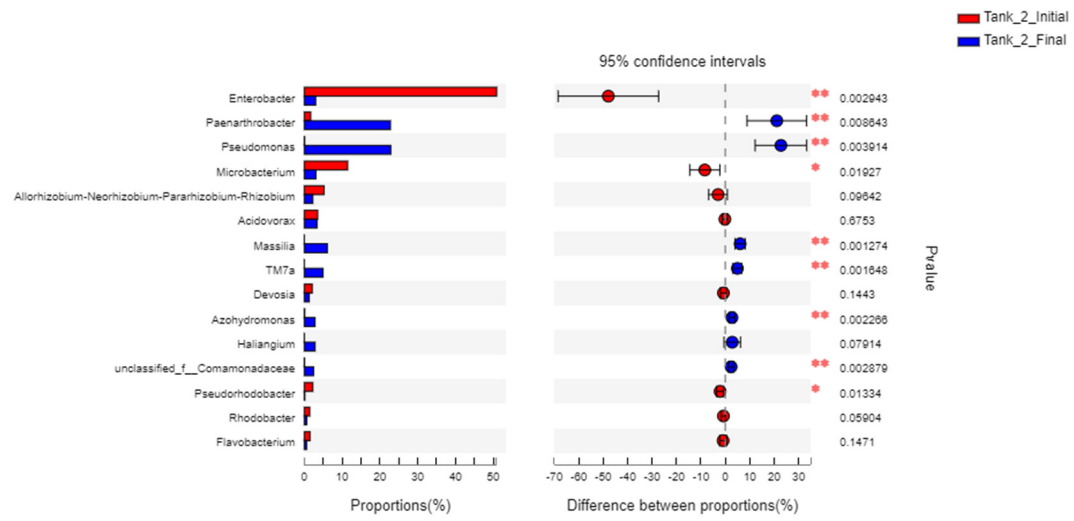

**Figure S3. Student's t-test bar plot on phylum level (a, b) and genus level (c, d) for the initial and final sample of tanks 1 and 2. \*:  $p < 0.05$ ; \*\*:  $p < 0.01$ ; \*\*\*:  $p < 0.001$ .**

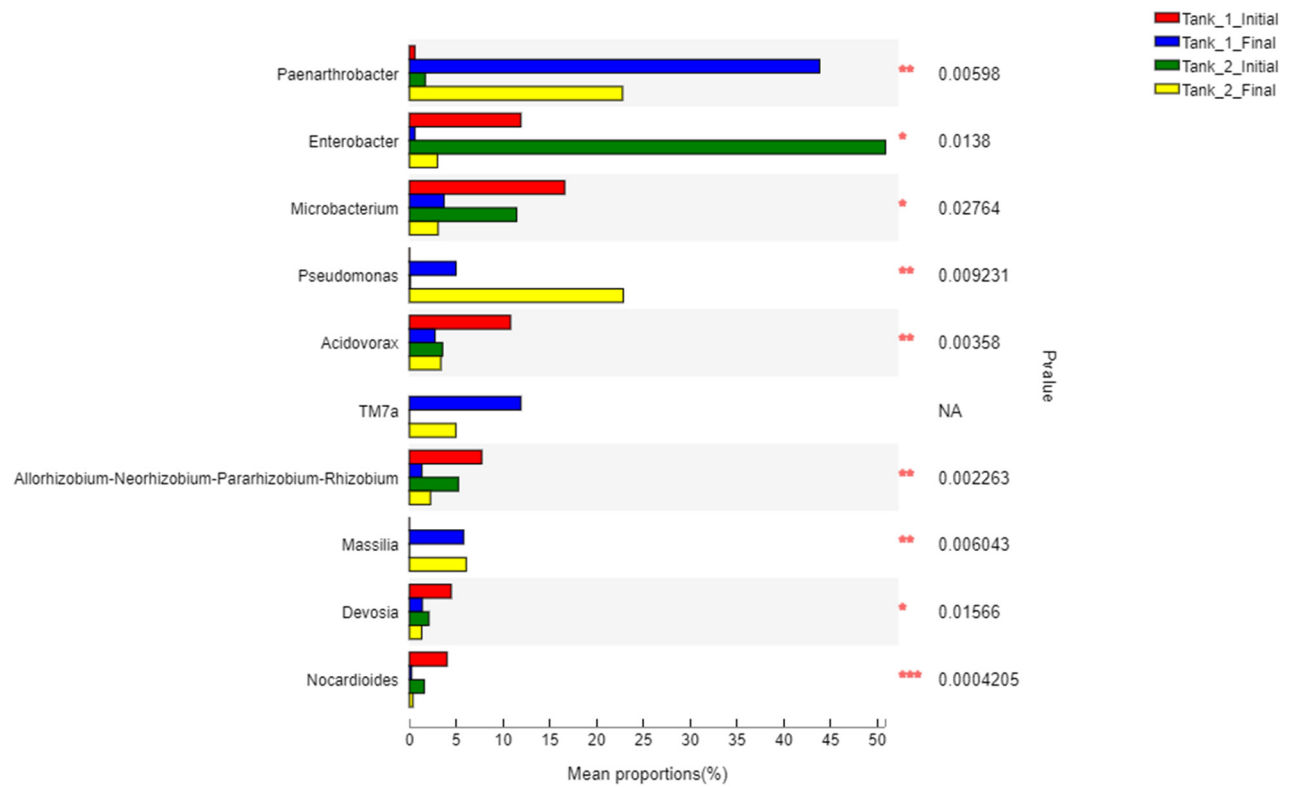

**Figure S4. One-way ANOVA bar plot for the initial and final samples of both tanks.**

**\*:  $p < 0.05$ ; \*\*:  $p < 0.01$ ; \*\*\*:  $p < 0.001$ .**

## References

- Cao, S., Du, R., Li, B., Ren, N., Pen, yongzhen, 2016. High-throughput profiling of microbial community structures in an ANAMMOX-UASB reactor treating high-strength wastewater. *Appl Microbiol Biotechnol* 11.
- Sun, S., Liu, J., Zhang, M., He, S., 2019. Simultaneous improving nitrogen removal and decreasing greenhouse gas emission with biofilm carriers addition in ecological floating bed. *Bioresource Technology* 292, 121944.  
<https://doi.org/10.1016/j.biortech.2019.121944>
