# Supplementary material for: Effects of Enrofloxacin on Nutrient Removal by a Floating Treatment Wetland Planted with Iris pseudacorus: Response and Resilience of Rhizosphere Microbial Communities
Source: MDPI journal article supplement (doi:10.3390/su14063358), 2022-03-13
Supplement: s1 [file s1]

Archive with 1 entries (1 files):
- sustainability-1628864-supplementary.pdf
